# Supplementary material for: Integrated photoelectrochemical energy storage: solar hydrogen generation and supercapacitor
Source: PubMed Central journal article supplement — Sci Rep. 2012 Dec 14;2:981. doi: 10.1038/srep00981 (PMC3522068; doi:10.1038/srep00981), 2012-12-14
Supplement: srep00981-s1.pdf [file srep00981-s1.pdf]

Supporting Information for

# **Integrated photoelectrochemical energy storage: solar hydrogen generation and supercapacitor**

**Xinhui Xia<sup>1,3,‡</sup>, Jingshan Luo<sup>1,‡</sup>, Zhiyuan Zeng<sup>2</sup>, Cao Guan<sup>1</sup>, Yongqi Zhang<sup>3</sup>,  
Jiangping Tu<sup>3</sup>, , Hua Zhang<sup>2</sup> & Hong Jin Fan<sup>1\*</sup>**

<sup>1</sup> Division of Physics and Applied Physics, School of Physical and Mathematical Sciences, Nanyang Technological University, Singapore 637371, Singapore

<sup>2</sup>School of Materials Science and Engineering, Nanyang Technological University, Singapore 639798, Singapore

<sup>3</sup> State Key Laboratory of Silicon Materials and Department of Materials Science and Engineering, Zhejiang University, Hangzhou 310027, P. R. China

\* Corresponding author. Email: [fanhj@ntu.edu.sg](mailto:fanhj@ntu.edu.sg)

‡ These authors contributed equally to this work

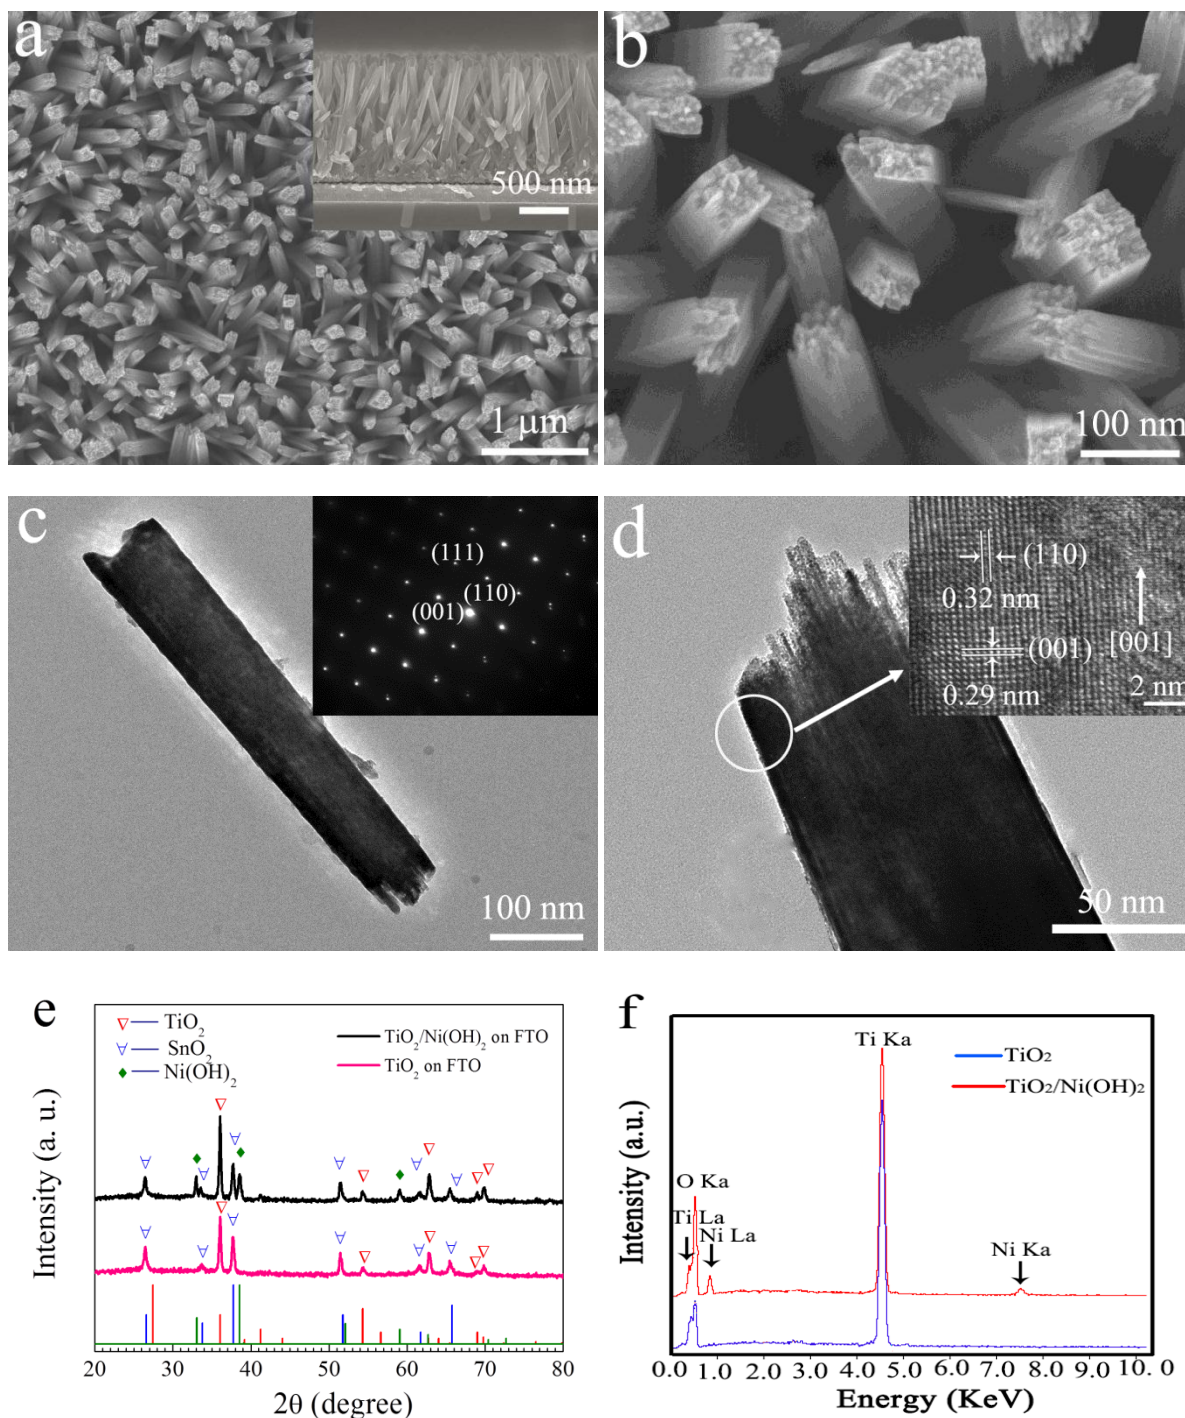

**Figure S1. Characterization of the TiO<sub>2</sub> nanorods.** (a) SEM image of the nanorod array. The side view is provided in inset. (b) Enlarged top-view of the nanorod array. (c and d) TEM images of individual TiO<sub>2</sub> nanorod with the corresponding electron diffraction pattern and HRTEM image, respectively. (e) XRD pattern of the TiO<sub>2</sub> nanorod array and the TiO<sub>2</sub>/Ni(OH)<sub>2</sub> core/branch nanorod array. (f) EDS spectra of the pure TiO<sub>2</sub> nanorod and TiO<sub>2</sub>/Ni(OH)<sub>2</sub> core/branch nanorods.

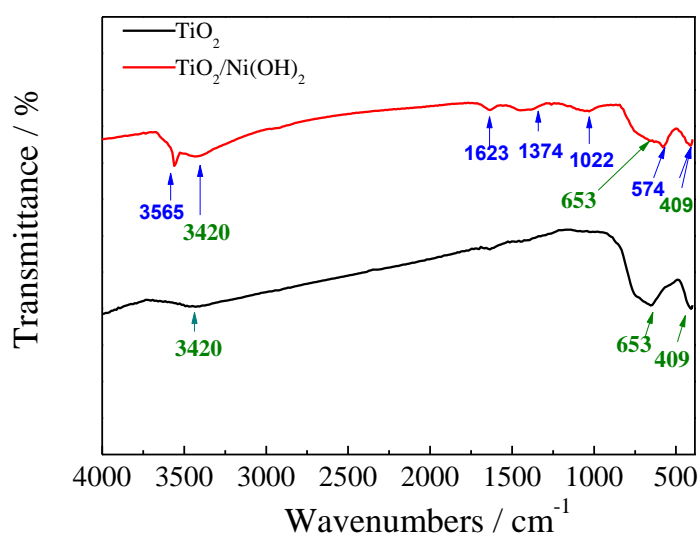

**Figure S2.** FTIR spectra of TiO<sub>2</sub> and TiO<sub>2</sub>/Ni(OH)<sub>2</sub> core/shell nanorods scratched from FTO substrates.

In the FTIR spectrum of the TiO<sub>2</sub>/Ni(OH)<sub>2</sub> core/shell nanorod, the peak around 3565 cm<sup>-1</sup> is characteristic of non-hydrogen bonds O-H stretching vibrations of β-Ni(OH)<sub>2</sub>. A broad OH band centered 3420 cm<sup>-1</sup> is indicative of hydrogen bonded water within the film structure and the band at 1623 cm<sup>-1</sup> corresponds to the angular deformation of molecular water. The peaks in the range of 1022-1374 cm<sup>-1</sup> belong to SO<sub>4</sub><sup>2-</sup> from the reagents. The bands at 574 cm<sup>-1</sup> correspond to δ(OH) vibration. Both samples have peaks centered at 653 and 409 cm<sup>-1</sup> characteristic of rutile TiO<sub>2</sub>.

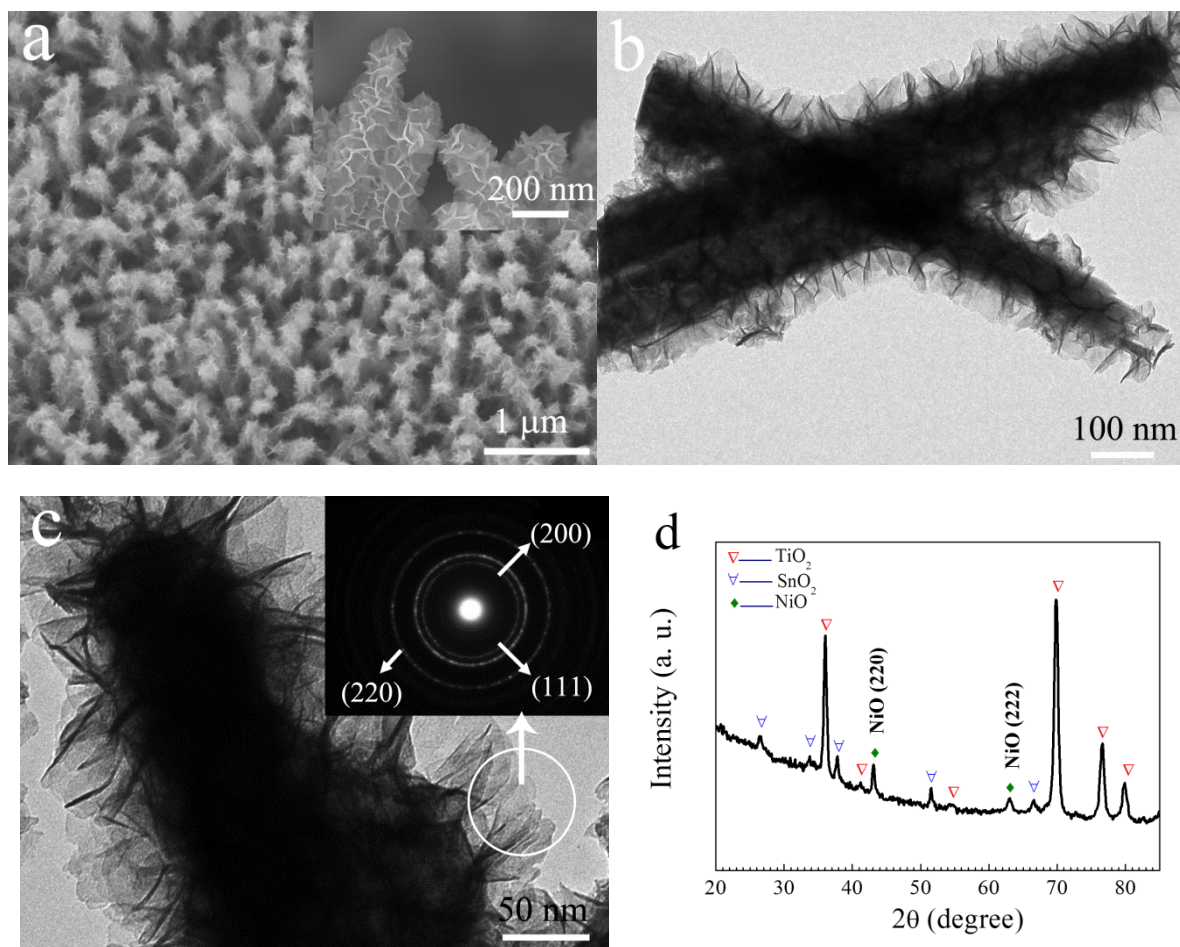

**Figure S3.**  $\text{TiO}_2/\text{NiO}$  core/shell nanorod arrays. **(a)** SEM image of  $\text{TiO}_2/\text{NiO}$  core/shell nanorod arrays. **(b)**, **(c)** TEM images of  $\text{TiO}_2/\text{NiO}$  core/shell nanorods (SAED pattern in inset). The nanoflake shell has a polycrystalline SAED pattern corresponding to cubic NiO phase. **(d)** XRD pattern of  $\text{TiO}_2/\text{NiO}$  core/shell nanorod arrays on FTO, showing that the core/shell nanorod arrays contain rutile  $\text{TiO}_2$  (JCPDS 88-1175) and cubic NiO phase (JCPDS 4-0835).

### Synthesis of self-supported TiO<sub>2</sub>/Co(OH)<sub>2</sub> core/shell nanorod arrays

TiO<sub>2</sub>/Co(OH)<sub>2</sub> core/shell nanorod arrays were prepared by the combination of hydrothermal synthesis and cathodic electrodeposition methods. The TiO<sub>2</sub> nanorod arrays on FTO were first grown via the hydrothermal synthesis method as mentioned above. Then the TiO<sub>2</sub> nanorod arrays were used as the scaffold for Co(OH)<sub>2</sub> nanoflake growth through a facile electrodeposition method. Electrolyte for electrodeposition was obtained by dissolving 6 g Co(NO<sub>3</sub>)<sub>2</sub> and 0.85 g NaNO<sub>3</sub> into 100 ml distilled H<sub>2</sub>O. The electrodeposition of Co(OH)<sub>2</sub> was carried out in a three-compartment system, the above TiO<sub>2</sub> nanorod arrays electrode as the working electrode, Ag/AgCl electrode as the reference electrode and a Pt foil as the counter-electrode. The Co(OH)<sub>2</sub> was deposited by cyclic voltammetry as follows: two cycles were conducted in the potential range of -0.4 – -1 V with a sweep rate of 10 mV s<sup>-1</sup>. Finally, the samples were taken off and rinsed with distilled water. The load weight of the Co(OH)<sub>2</sub> is approximately 0.16 mg cm<sup>-2</sup>. The SEM images of the obtained core/shell nanorod arrays and XRD pattern are shown in Fig. S4.

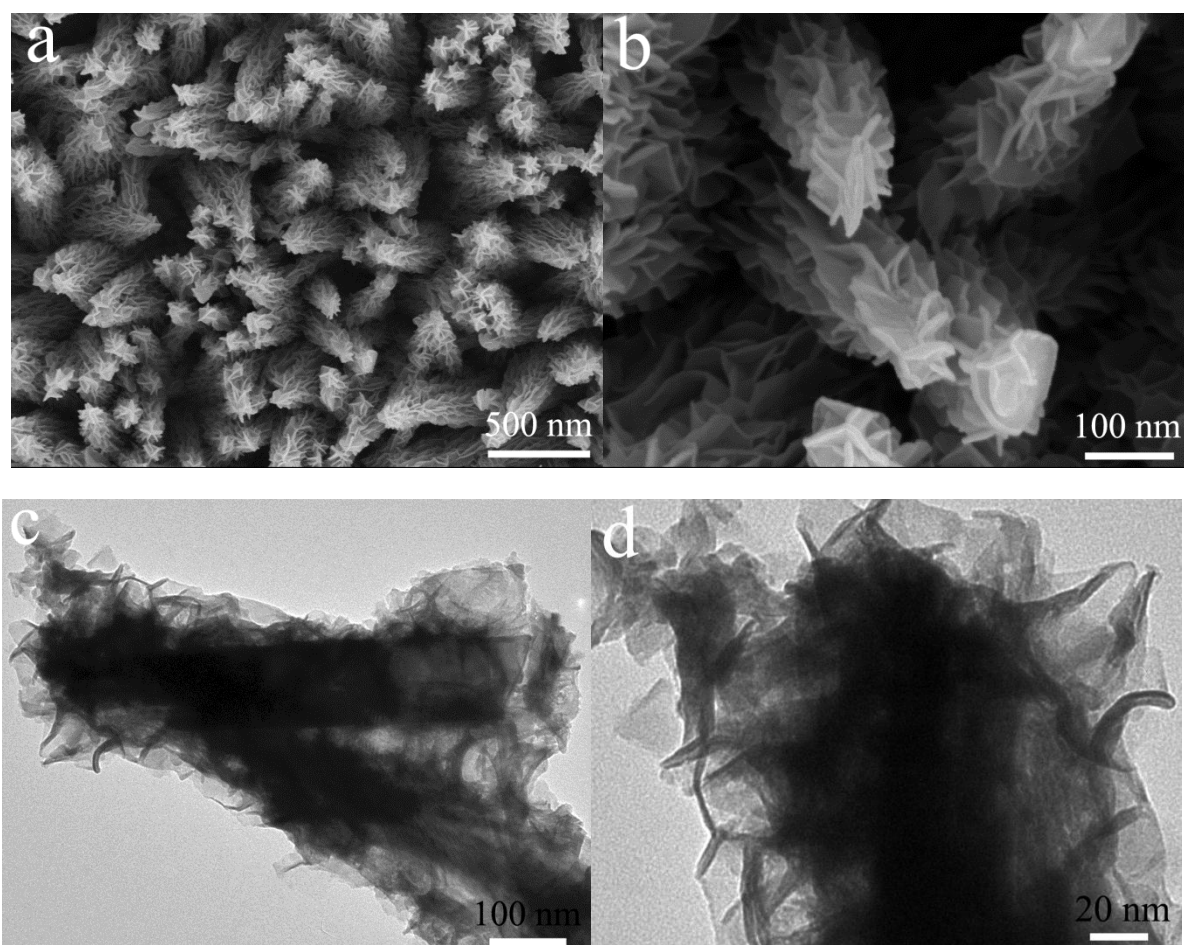

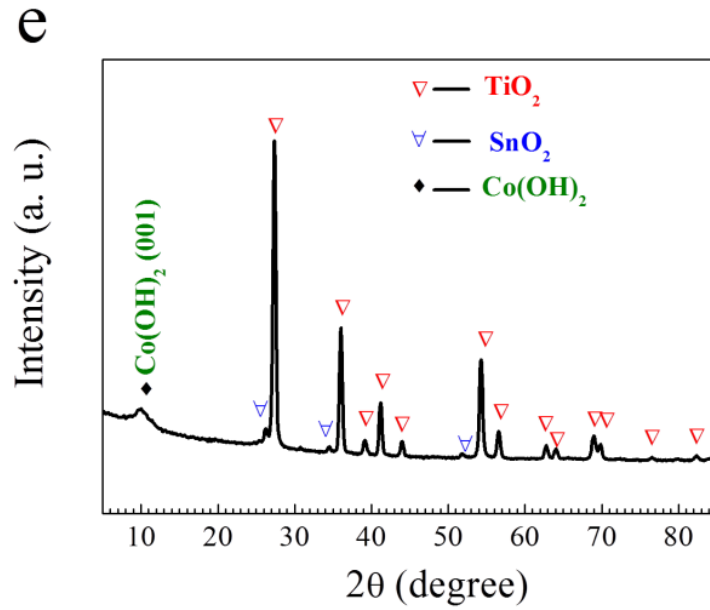

**Figure S4.**  $\text{TiO}_2/\text{Co(OH)}_2$  core/shell nanorod arrays. (a), (b) SEM images of  $\text{TiO}_2/\text{Co(OH)}_2$  core/shell nanorod arrays prepared by the combination of hydrothermal synthesis and cathodic electrodeposition. (c), (d) TEM images of  $\text{TiO}_2/\text{Co(OH)}_2$  core/shell nanorods. The  $\text{Co(OH)}_2$  nanoflakes have a thickness around 10 nm. (e) XRD pattern of  $\text{TiO}_2/\text{Co(OH)}_2$  core/shell nanorod arrays on FTO. The electrodeposited  $\text{Co(OH)}_2$  is indexed to the  $\alpha$ - $\text{Co(OH)}_2$  phase (JCPDS 74-1057).



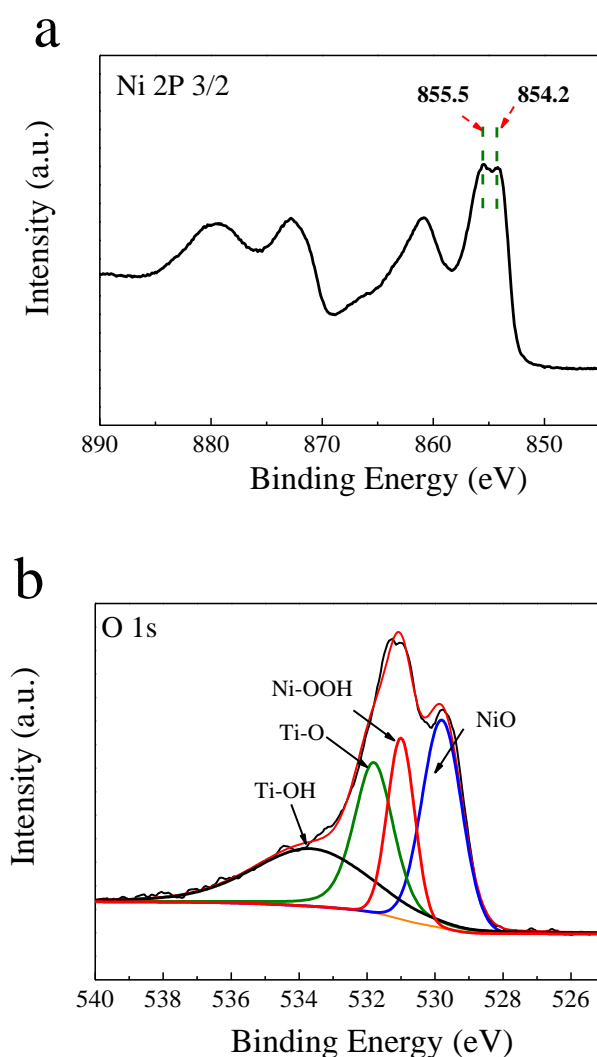

**Figure S5.** XPS spectra of  $\text{TiO}_2/\text{Ni}(\text{OH})_2$  core/shell nanorod arrays after photooxidation (a) Ni  $2p_{3/2}$  and (b) O 1s.

Notice that Ni  $2p_{3/2}$  peak has two separated components. The peak at 854.2 eV is due to Ni–O bonds and the other one at 855.5 eV corresponds to Ni–OOH bonds. The Ni–OOH bonds mainly come from higher valence nickel hydroxides ( $\text{NiOOH}$ ) or  $4\text{Ni}(\text{OH})_2 \cdot \text{NiOOH} \cdot x\text{H}_2\text{O}$ . In the O1s spectra, the peak at 531.3 eV indicates the existence of Ni–OOH bonds, which is also consistent with the Ni  $2p_{3/2}$  spectrum. The key results from the XPS test indicate that  $\text{Ni}(\text{OH})_2$  can be photooxidized by the holes.

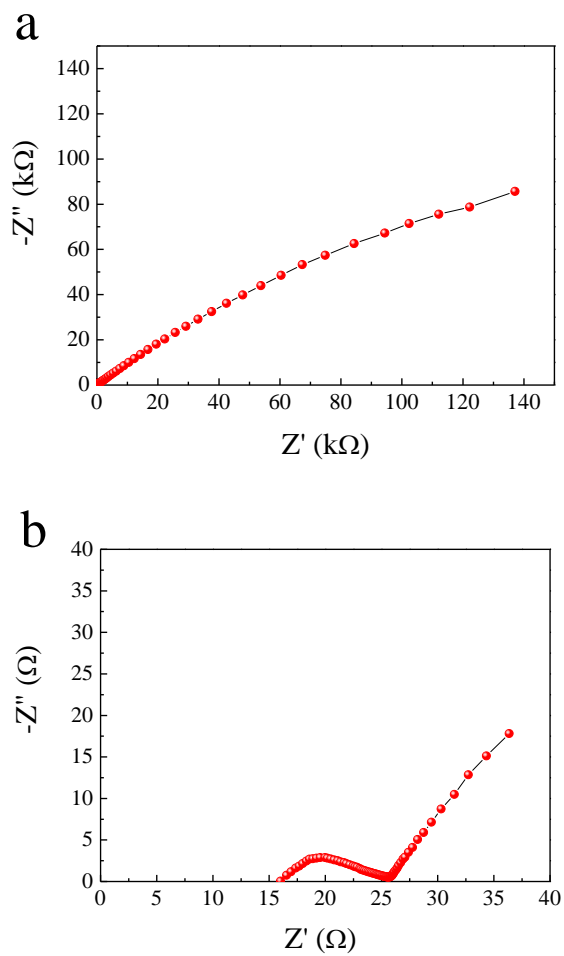

**Figure S6.** Nyquist plots of  $\text{TiO}_2/\text{Ni(OH)}_2$  core/shell nanorod arrays (a) before and (b) after discharge.



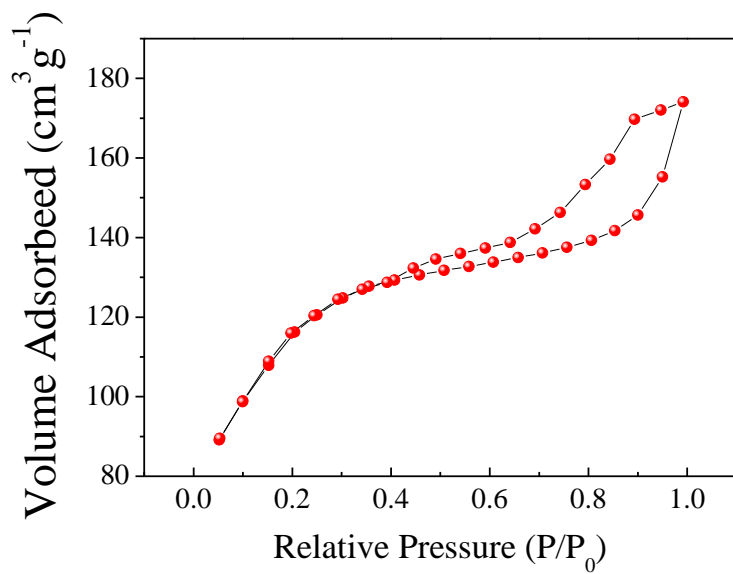

**Figure S7.** BET measurement of TiO<sub>2</sub>/Ni(OH)<sub>2</sub> core/shell nanorod arrays. The measured surface area is about 198 m<sup>2</sup> g<sup>-1</sup>.

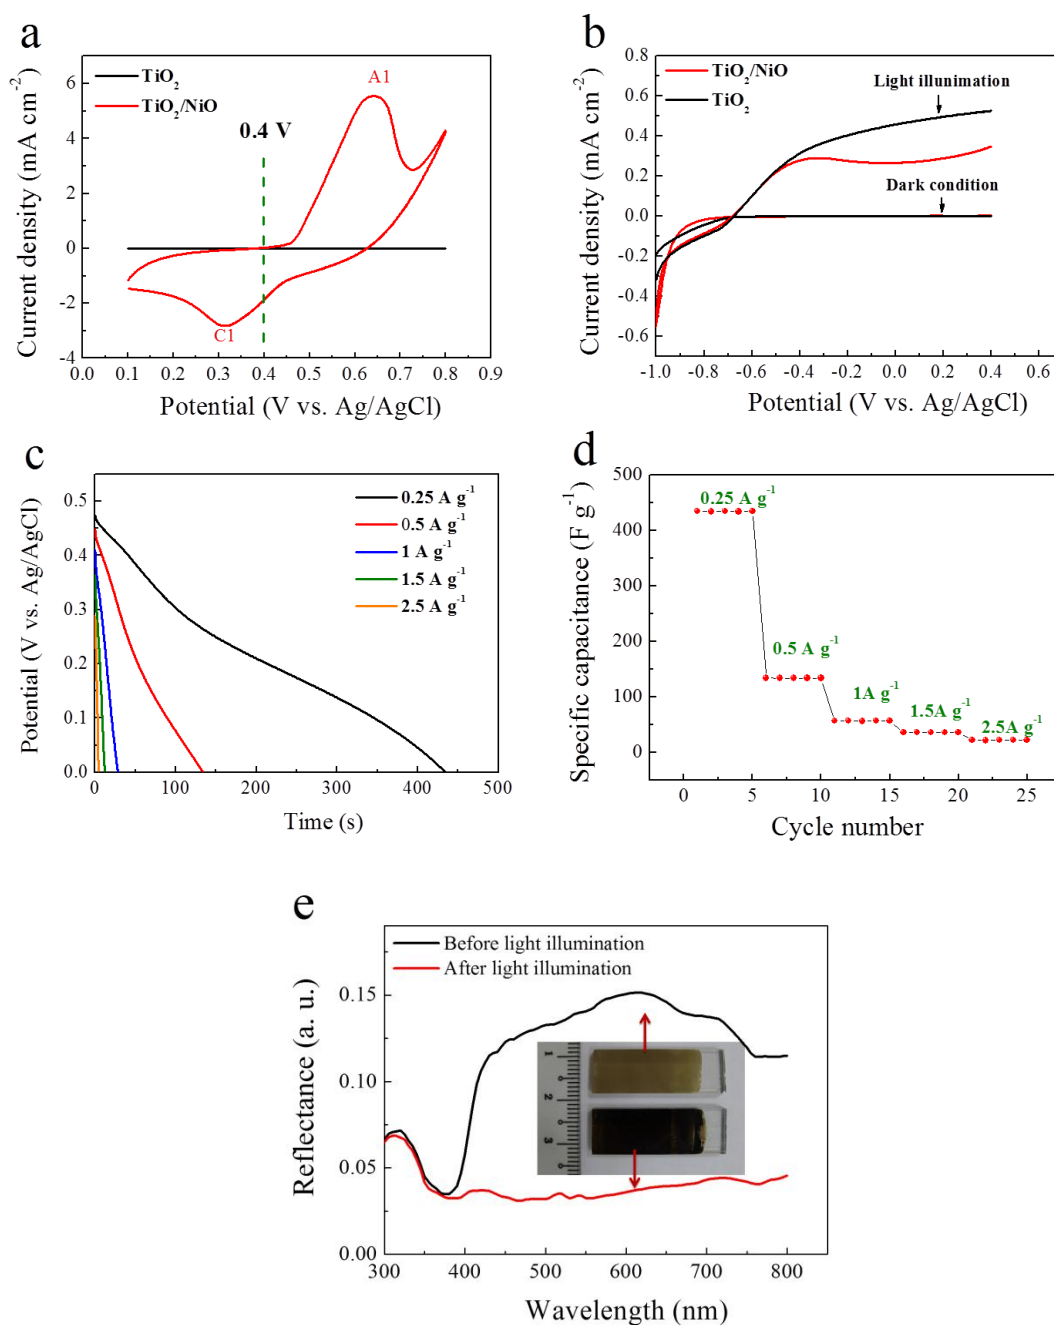

**Figure S8. Photoelectrochemical and pseudocapacitive characterizations of TiO<sub>2</sub>/NiO core/shell nanorod arrays.** (a) CV curves of TiO<sub>2</sub> and TiO<sub>2</sub>/NiO core/shell nanorod arrays on FTO in the potential region of 0.1–0.8 V at a scanning rate of 10 mV s<sup>-1</sup> at the second cycle. (b) *J*–*V* curves under dark condition and simulated solar light illumination. (c) Discharge curves of the core/shell nanorod arrays with simulated solar light illumination at 0.4 V bias for 300 s at various discharge current densities. (d) Specific capacitances of the core/shell nanorod arrays at various discharge current densities. (e) Diffuse reflectance spectra of the core/shell nanorod arrays before and after discharge (Inset: photographs of samples).

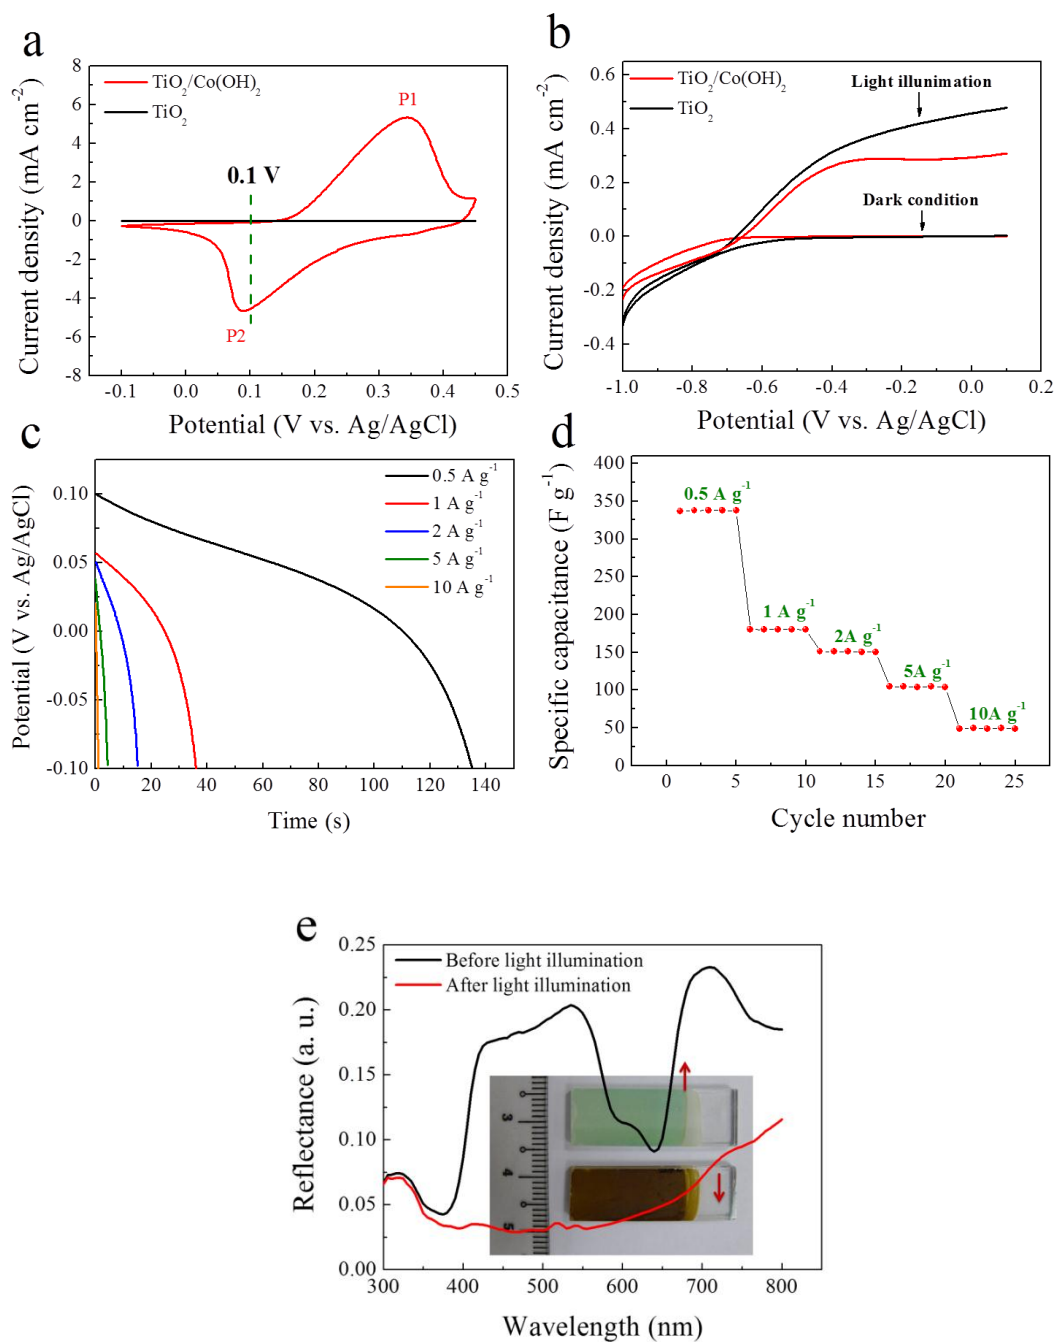

**Figure S9. Photoelectrochemical and pseudocapacitive characterizations of  $\text{TiO}_2/\text{Co(OH)}_2$  core/shell nanorod arrays.** (a) CV curves of  $\text{TiO}_2$  and the  $\text{TiO}_2/\text{Co(OH)}_2$  core/shell nanorod arrays on FTO in the potential region of -0.1– 0.45 V at a scanning rate of  $10 \text{ mV s}^{-1}$  at the second cycle. (b)  $J$ - $V$  curves under dark condition and simulated solar light illumination. (c) Discharge curves of the core/shell nanorod arrays with simulated solar light illumination at 0.1 V bias for 300 s at various discharge current densities. (d) Specific capacitances of the core/shell nanorod arrays at various discharge current densities. (e) Diffuse reflectance spectra of the core/shell nanorod arrays before and after discharge (Inset: photographs of samples).
